# Supplementary material for: Biochemical and Biophysical Characterisation of the Hepatitis E Virus Guanine-7-Methyltransferase
Source: MDPI journal article supplement (doi:10.3390/molecules27051505), 2022-02-23
Supplement: s1 [file s1]

## Supplementary File

# Biochemical and Biophysical Characterisation of the Hepatitis E Virus Guanine-7-Methyltransferase

Preeti Hooda <sup>1,†</sup>, Mohd Ishtikhar <sup>1,†</sup>, Shweta Saraswat <sup>1</sup>, Pooja Bhatia <sup>1</sup>, Deepali Mishra <sup>1</sup>, Aditya Trivedi <sup>1</sup>,  
Rajkumar Kulandaisamy <sup>2</sup>, Soumya Aggarwal <sup>3</sup>, Manoj Munde <sup>3</sup>, Nemat Ali <sup>4</sup>, Abdullah F. AlAsmari <sup>4</sup>,  
Mohd A. Rauf <sup>5</sup>, Krishna K. Inampudi <sup>2,\*</sup> and Deepak Sehgal <sup>1,\*</sup>

## MALDI-TOF

Molecular mass of the purified 37-kDa protein was determined by MALDI-TOF mass spectrometry, arbitrary index a.i.; charge-to-mass ratio, m/z. A dilution series of the peptide mixture was prepared and then mixed with a-cyano-4-hydroxycinnamic acid matrix (7.5mg/ml) in a 1;1 ratio. Each sample (0.5µl) was then spotted onto a single spot on a standard stainless steel plate in different amounts on 5800 MALDI-TOF/TOF analyzer (AB SCIEX). The laser power was set in 5500. MS spectra were acquired between 20000 to 60000m/z. and analysed by 4000 Series Explorer software, version 4.0 (AB SCIEX). The instrument was operated in positive ion mode and external calibration was performed using a calibration mixture 1 from mass calibration standard kit (AB SCIEX).

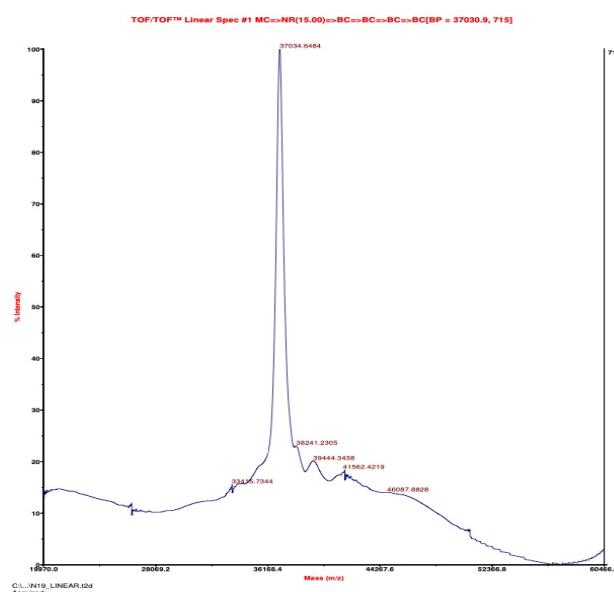

**Figure S1:** MALDI TOF analysis of purified HEV Methyltransferase. The major peak corresponds to the molecular weight of the HEV Methyltransferase i.e. 37.07kDa.
